# Supplementary material for: Catalytic epoxidation of C60using Mo(O)2(acac)2/tBuOOH
Source: Royal Society of Chemistry journal article supplement (doi:10.1039/c2dt32523c), 2012-11-15
Supplement: c2dt32523c.pdf [file c2dt32523c.pdf]

#405 Submitted for publication to *Dalton Trans.*

## **Catalytic Epoxidation of C<sub>60</sub> using Mo(O)<sub>2</sub>(acac)<sub>2</sub>/<sup>t</sup>BuOOH**

Robin E. Anderson and Andrew R. Barron\*

Department of Chemistry, and Department of Mechanical Engineering and Materials Science,  
Rice University, Houston, TX 77005

College of Engineering, Swansea University, Singleton Park, Swansea SA2 8PP, Wales UK

Supplementary Materials

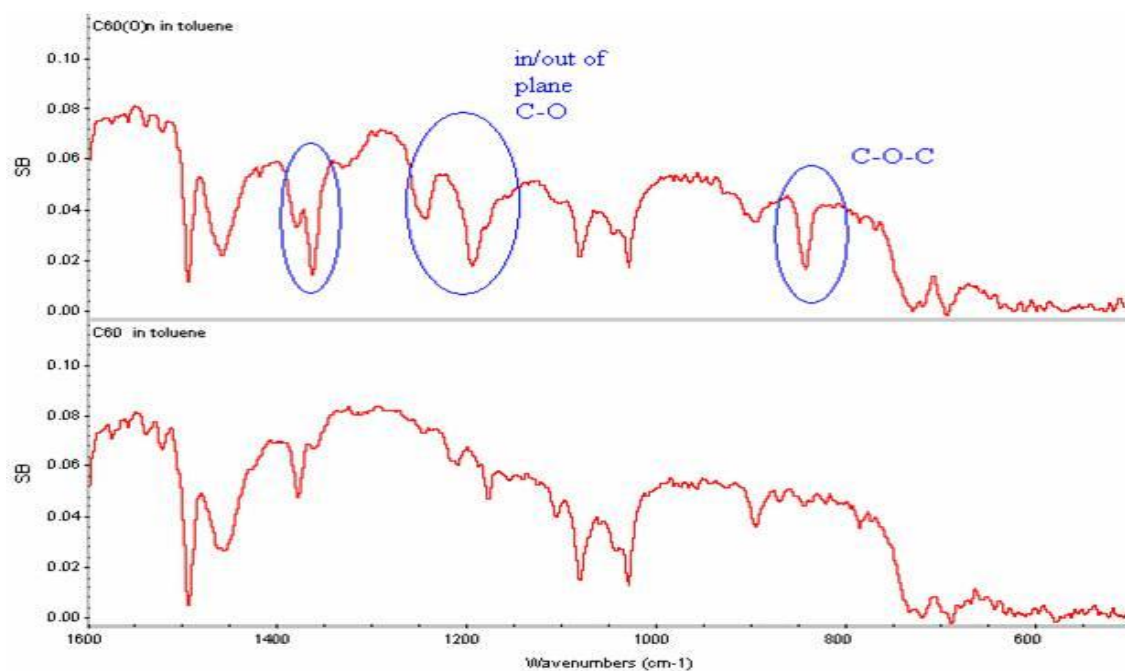

**Fig. S1.** IR spectra of C<sub>60</sub> (bottom) and C<sub>60</sub>(O)<sub>n</sub> (top) formed from the catalytic epoxidation of C<sub>60</sub> at 60 °C using an olefin:peroxide:catalyst ratio of 1:4:0.4.

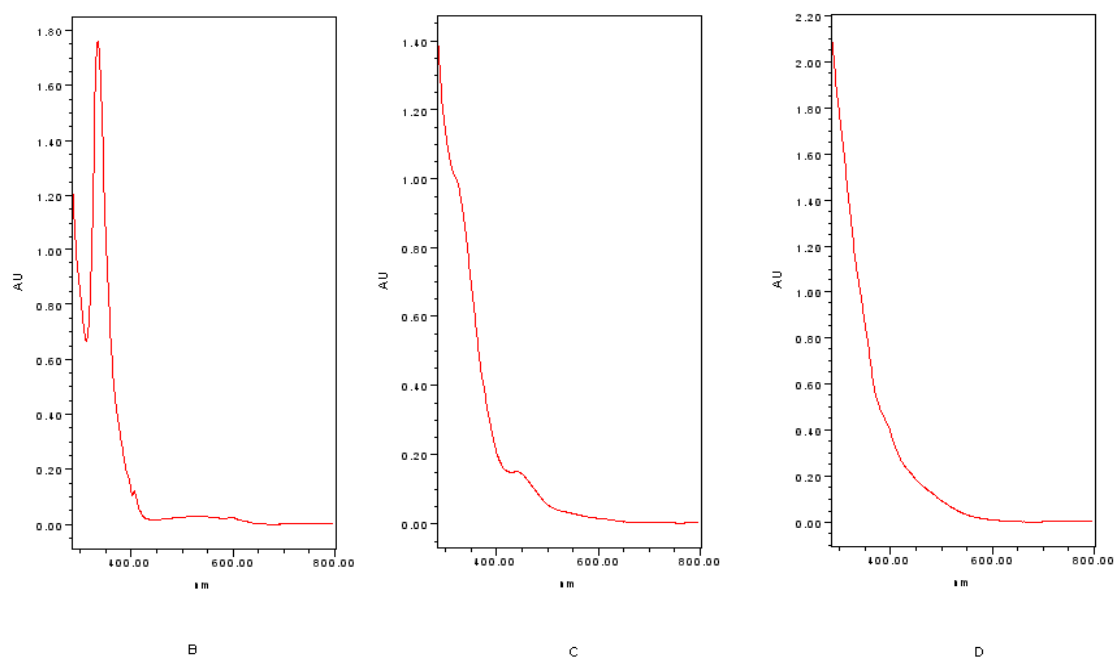

**Fig. S2** UV-visible spectrum taken at (b) 9.2 min, (c) 5.5 min and (d) 4.1 min.
